# Supplementary material for: “Freezing” Thermophiles: From One Temperature Extreme to Another
Source: MDPI journal article supplement (doi:10.3390/microorganisms10122417), 2022-12-06
Supplement: s1 [file s1]

**Table S1. Some properties of psychrophilic habitats of thermophilic microorganisms.**

| <b>Environment</b>                                              | <b>Man-made or nature environment</b> | <b>Human influence</b>                                          | <b>Temperature (Table 1)</b> |
|-----------------------------------------------------------------|---------------------------------------|-----------------------------------------------------------------|------------------------------|
| Svalbard, marine surface sediments                              | nature environment                    | low to very low human influenced*                               | -2 to +7°C                   |
| Aarhus Bay                                                      | nature environment                    | Close to settlements with high human influenced index           | 0 to 15°C                    |
| Eastern Gulf of Mexico, marine surface sediments                | nature environment                    | Close to settlements with high human influenced index           | not available                |
| Mexico to Santa Catalina Island, marine surface sediments       | nature environment                    | Close to settlements with high human influenced index           | ~4°C                         |
| Deep sea sediments, Peru margin, eastern equatorial Pacific     | nature environment                    | Close to settlements with middle to high human influenced index | not available                |
| Axial Volcano and Endeavour Segment, northeastern Pacific Ocean | nature environment                    | Close to settlements with middle to high human influenced index | 6–34 °C                      |
| Macdonald Seamount                                              | nature environment                    | low to very low human influenced                                | 4 °C                         |
| Cool soil environments in Northern Ireland and Bolivia          | nature environment                    | Close to settlements with high human influenced index           | max. 25°C                    |

| Environment                                     | Man-made or nature environment | Human influence                                       | Temperature (Table 1) |
|-------------------------------------------------|--------------------------------|-------------------------------------------------------|-----------------------|
| Subsurface soil environment in Northern Ireland | nature environment             | Close to settlements with high human influenced index | max. 25°C             |
| sub-Arctic environments                         | nature environment             | low to very low human influenced                      | -20.1-44.5 °C         |
| Point Barrow, Alaska                            | nature environment             | low human influenced                                  | max. ~20°C            |
| Lake Vostok                                     | nature environment             | very low human influenced                             | °<br>below 0 °C, -2°C |
| Deception Volcano                               | nature environment             | very low human influenced                             | 0°C                   |
| Kamchatka peninsula                             | nature environment             | low human influenced                                  | -2°C                  |

\*Wildlife Conservation Society - WCS, and Center for International Earth Science Information Network - CIESIN - Columbia University. 2005. Last of the Wild Project, Version 2, 2005 (LWP-2): Last of the Wild Dataset (Geographic). Palisades, New York: NASA Socioeconomic Data and Applications Center (SEDAC). <https://doi.org/10.7927/H4348H83>. Accessed 20 Nov 2022.

**Table S2. Main strategies and molecular targets to address molecular mechanisms of survival of thermophiles in psychrobiotic environments**

|                                                                                                      |
|------------------------------------------------------------------------------------------------------|
| Mechanisms of thermo- and chemotaxis                                                                 |
| Respiratory enzymes (NiFe-hydrogenases) & other enzymes of energy metabolism                         |
| Enzymatic machineries regulated by different temperatures                                            |
| Investigations of the minimal energy required for survival in cold environments                      |
| Natural cryoprotectants                                                                              |
| Interactions of cell surface molecules with metals and mineral particles                             |
| Proteomic and metabolomic profiling, lipidomics, transcriptomics, genomic studies                    |
| Biophysical/biochemical structural and functional studies of proteins implicated in cryopreservation |
